# Supplementary material for: Dynamic trafficking patterns of IL-17-producing γδ T cells are linked to the recurrence of skin inflammation in psoriasis-like dermatitis
Source: PubMed Central journal article supplement — eBioMedicine. 2022 Jul 1;82:104136. doi: 10.1016/j.ebiom.2022.104136 (PMC9256835; doi:10.1016/j.ebiom.2022.104136), 2022-07-01

**Table S1. Demographics and Clinical Characteristics of Human Psoriasis Patients**

|                                     |               |
|-------------------------------------|---------------|
| <b>Sex, ethnicity, age, weight</b>  |               |
| Female                              | 4/21 (19%)    |
| Male                                | 17/21 (81%)   |
| Chinese                             | 21/21 (100%)  |
| Age (years)                         | 50.8 (9.4)    |
| Weight (Kg)                         | 72.0 (8.1)    |
| <b>Body-mass index percentile</b>   |               |
| Under weight                        | 1/21 (4.8%)   |
| Normal weight                       | 4/21 (19%)    |
| Over weight                         | 13/21 (61.9%) |
| Obese                               | 3/21 (14.3%)  |
| Psoriasis duration (years)          | 18.1 (8.9)    |
| Family history of psoriasis         | 6/21 (28.6%)  |
| <b>Previous psoriasis treatment</b> |               |
| Topical treatments                  | 20/21 (95.2%) |
| Phototherapy                        | 11/21 (52.4%) |
| Acitretin                           | 11/21 (52.4%) |
| Methotrexate                        | 2/21 (9.5%)   |
| Adalimumab                          | 4/21 (19%)    |
| Ustekinumab                         | 4/21 (19%)    |
| Metabolic syndrome                  | 6/21 (28.6%)  |

**Table S2. Detailed information on psoriasis patients treated with GC**

| Patient#       | Pre-PASI | Post-PASI | Recurrent PASI | Efficacy (%) | *Effective treatment | Recurrent | Systematic treatment                    |
|----------------|----------|-----------|----------------|--------------|----------------------|-----------|-----------------------------------------|
| 1              | 17.8     | 10.8      |                | 37.93%       | No                   |           | UV and Acitretin                        |
| 2 <sup>#</sup> | 22.5     | 9.9       | 22.3           | 56.00%       | Yes                  | Yes       | Ustekinumab                             |
| 3              | 10.3     | 2.8       | 4.8            | 72.82%       | Yes                  | No        | Acitretin                               |
| 4              | 23.8     | 11.8      | 18.4           | 50.42%       | Yes                  | Yes       | UV, Acitretin, Adalimumab               |
| 5              | 34.2     | 21.5      | 20             | 37.13%       | No                   | No        | UV, Acitretin                           |
| 6              | 14.8     | 5.7       | 17.9           | 61.49%       | Yes                  | Yes       | Ustekinumab, Acitretin                  |
| 7              | 21       | 10.4      | 18.6           | 50.48%       | Yes                  | Yes       | UV, Acitretin, Ustekinumab              |
| 8              | 11.4     | 6.8       | 9.6            | 40.35%       | No                   | No        | Acitretin                               |
| 9              | 11.5     | 6.6       | 3.5            | 42.24%       | No                   | No        | UV                                      |
| 10             | 42.4     | 20.9      | 42.4           | 50.71%       | Yes                  | Yes       | UV, Acitretin, Methotrexate, Adalimumab |
| 11             | 29.8     | 14.2      | 23.8           | 52.35%       | Yes                  | Yes       | UV, Acitretin, Methotrexate             |
| 12             | 26.7     | 9.5       | 35.8           | 64.42%       | Yes                  | Yes       | UV, Adalimumab                          |
| 13             | 11.6     | 6.6       | 9.5            | 43.10%       | No                   | No        | Acitretin                               |
| 14             | 23.4     | 17.1      | 29.1           | 26.92%       | No                   | No        | UV                                      |
| 15             | 11.7     | 7.9       | 8.9            | 32.48%       | No                   | No        | None                                    |
| 16             | 16       | 14.6      | 19             | 8.75%        | No                   | No        | None                                    |
| 17             | 15.8     | 7.4       | 16.4           | 53.16%       | Yes                  | Yes       | None                                    |
| 18             | 16.8     | 8.1       | 17             | 51.79%       | Yes                  | Yes       | None                                    |
| 19             | 31.2     | 14.4      | 28.8           | 53.85%       | Yes                  | Yes       | UV, Ustekinumab                         |
| 20             | 17       | 9.5       | 10.8           | 44.12%       | No                   | No        | Adalimumab                              |
| 21             | 15.3     | 7.1       | 30.1           | 53.69%       | Yes                  | Yes       | UV, Acitretin                           |

\*PASI50 was considered as an effective treatment

<sup>#</sup> Highlighted in red denotes eligible patients who were subjected to RNAseq analyses in this study

**Table S3. Specific Primer Sequences for Real-time PCR Analysis**

| Name         | Primer      | Sequences (5'-3')                 |
|--------------|-------------|-----------------------------------|
| GAPDH        | Forward (F) | CAC ATG GCC TCC AAG GAG TAA       |
|              | Reverse (R) | GTG AGG GTC TCT CTC TTC CTC TTG T |
| Human IL-7   | F           | GGGTGAAGCCCAACCAACAA              |
|              | R           | AGGATGCAGCTAAAGTTCGTGT            |
| Human CCL20  | F           | GCTTTGATGTCAGTGCTGCTACTC          |
|              | R           | GTATCAAGACAGCAGTCAAAGTTG          |
| Human IL-17  | F           | AGATTACTACAACCGATCCACCT           |
|              | R           | GGGGACAGAGTTCATGTGGTA             |
| Human IL-23  | F           | CGTCTCCTTCTCCGCTTCAA              |
|              | R           | ACCCGGGCGGCTACAG                  |
| Human CCL2   | F           | GCAATCAATGCCCCAGTCAC              |
|              | R           | GACACTTGCTGCTGGTGATTC             |
| Human CCL5   | F           | CAGTCGTCTTTGTCACCCGA              |
|              | R           | TCTTCTCTGGGTTGGCACAC              |
| Human CXCL10 | F           | TGCCATTCTGATTTGCTGCC              |
|              | R           | TGCAGGTACAGCGTACAGTT              |
| $\beta$ -MG  | F           | CTTTCTGGTGCTTGTCTC                |
|              | R           | TCAGTATGTTCGGCTTCC                |
| Mouse CCL20  | F           | TTTTGGGATGGAATTGGACAC             |
|              | R           | TGCAGGTGAAGCCTTCAACC              |
| Mouse CCL2   | F           | GGTCCCTGTCATGCTTCTGG              |
|              | R           | GCTGCTGGTGATCCTCTTGT              |

**Figure S1**

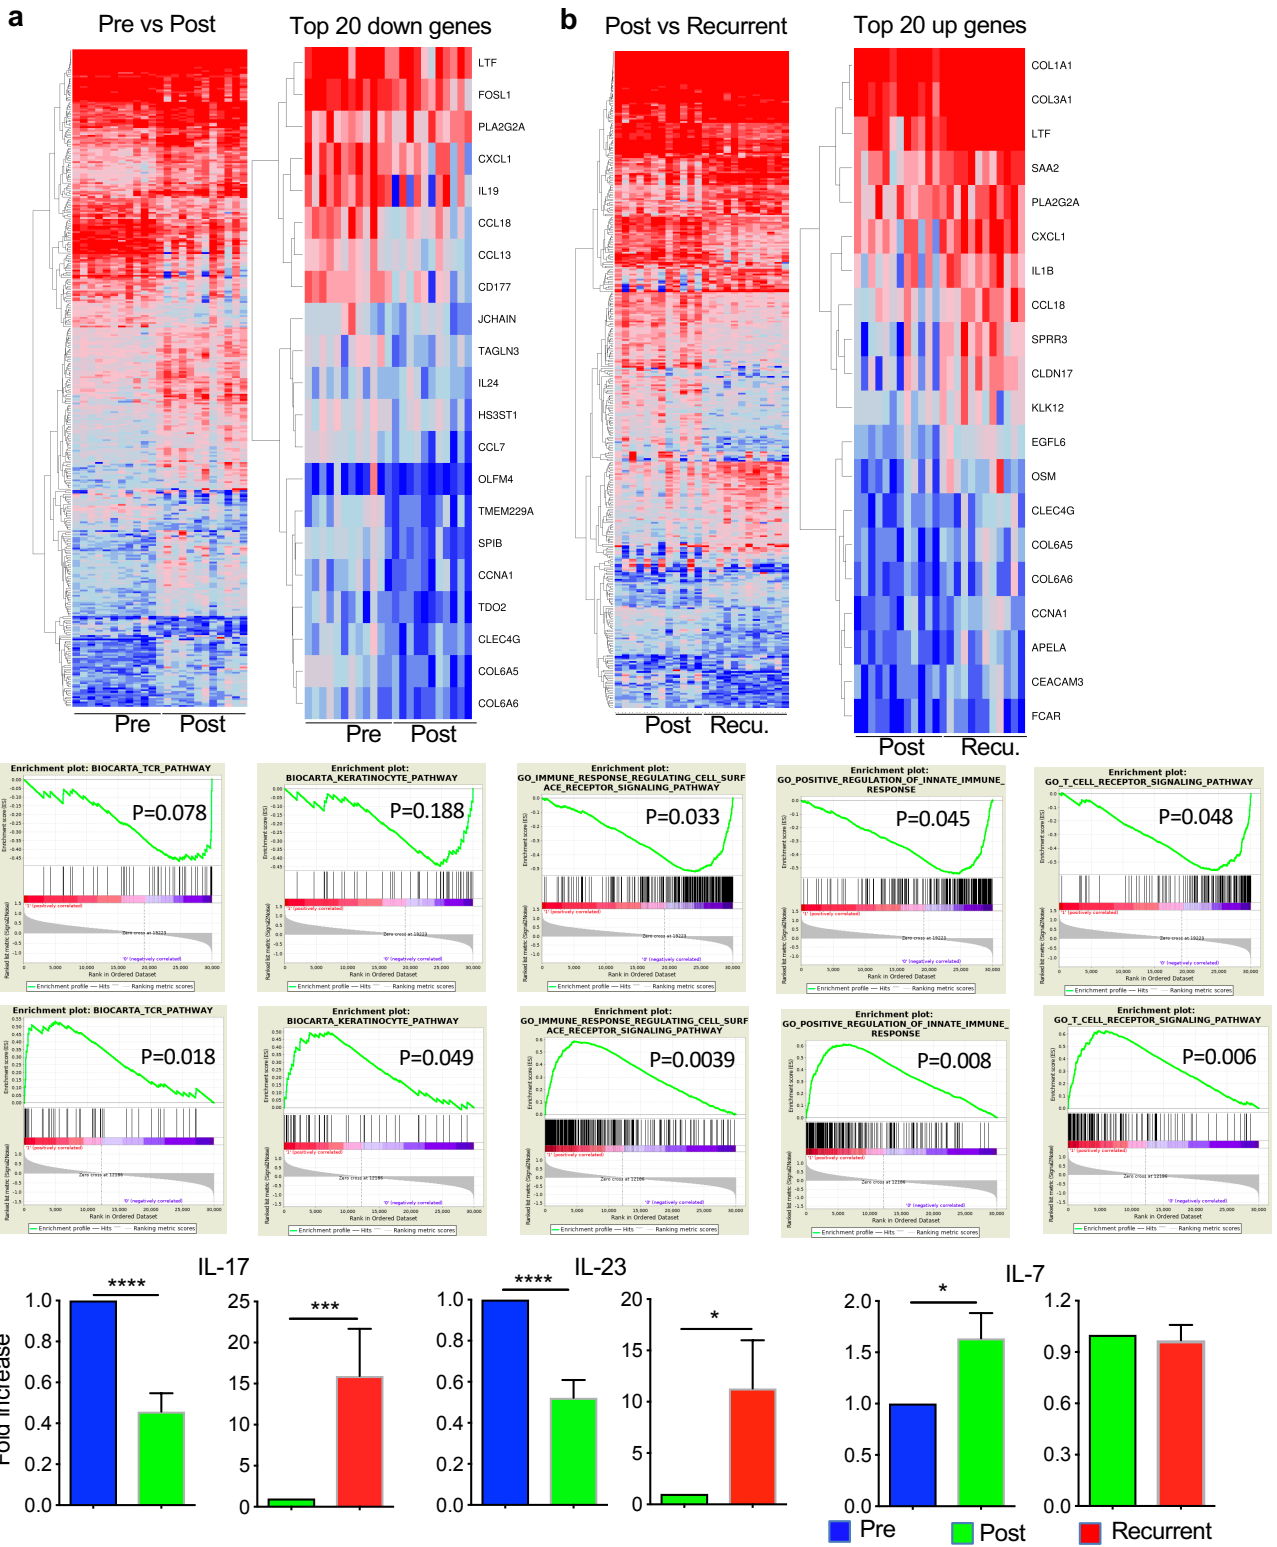



**Figure S3**

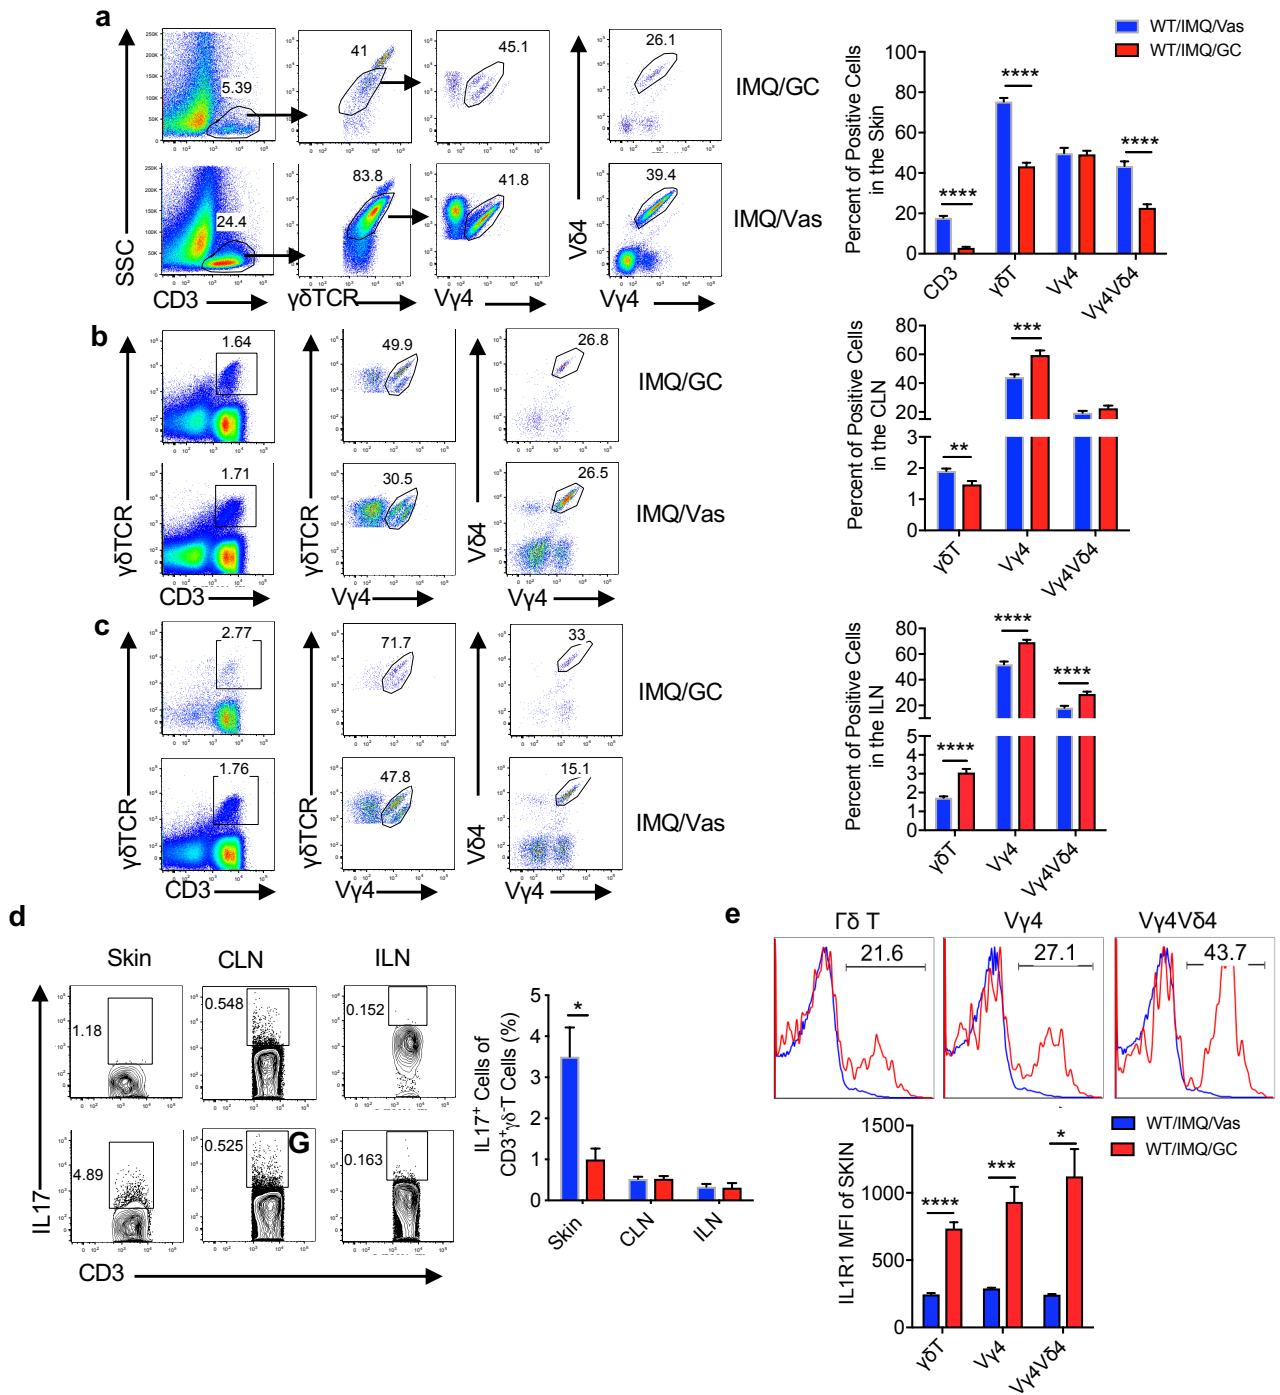

**Figure S4**

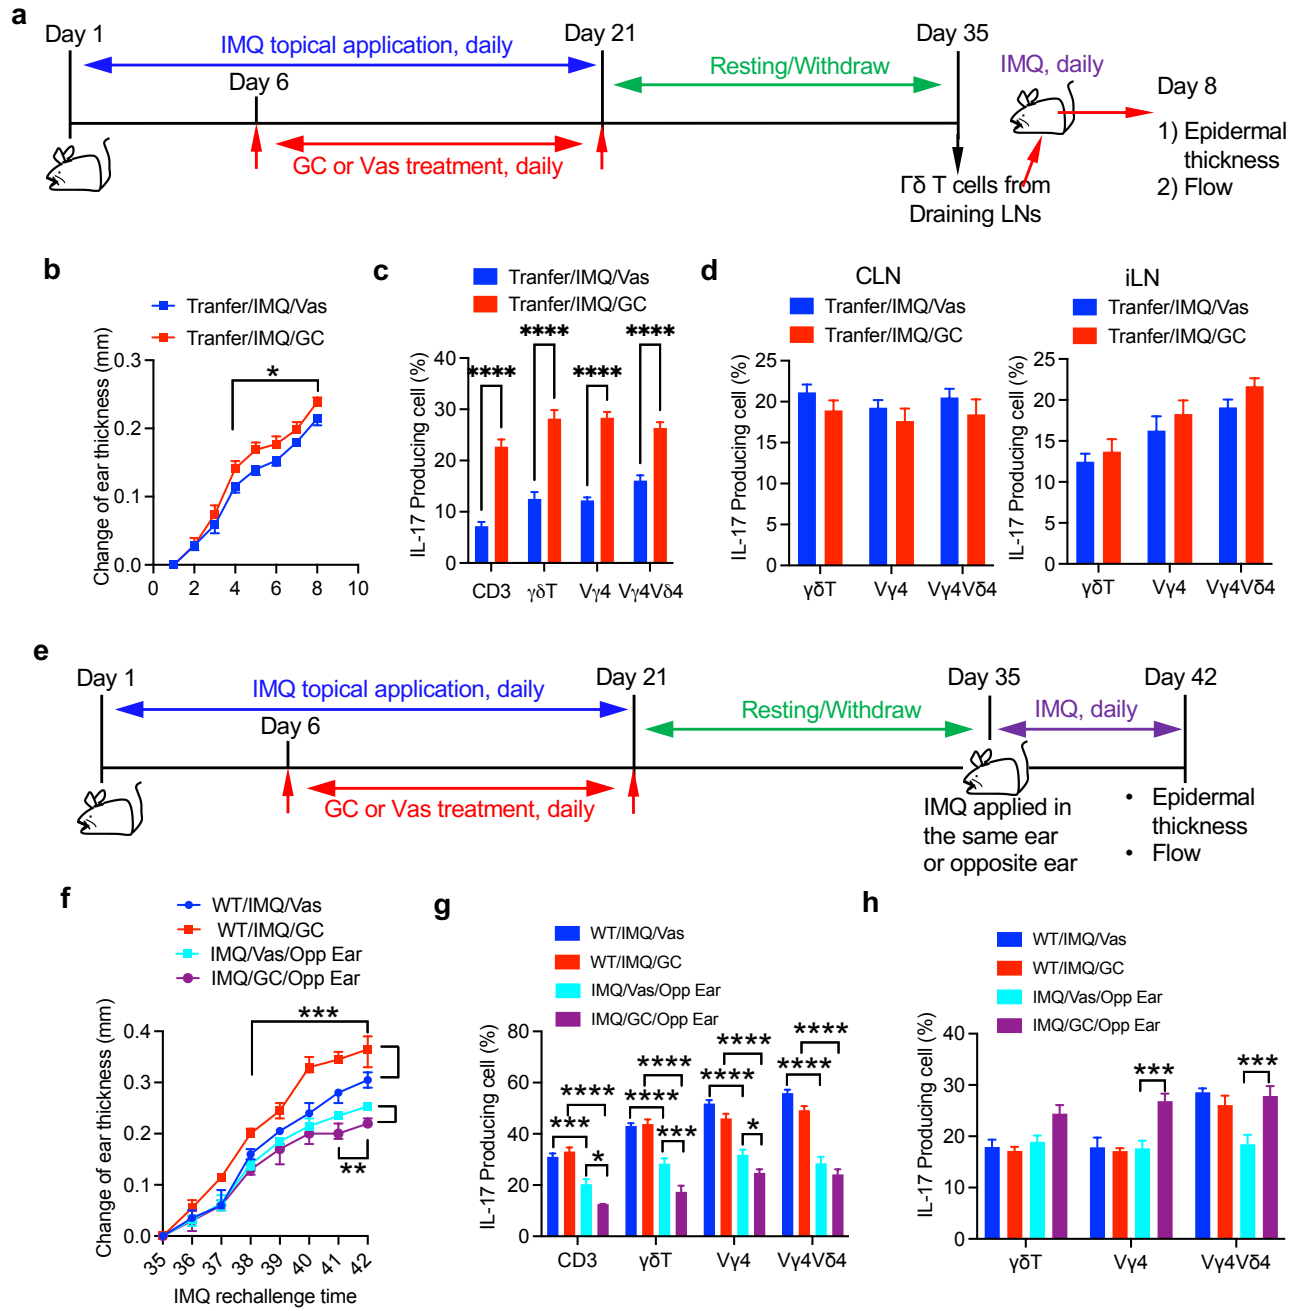

Supplement: mmc2.pdf [file mmc2.pdf]
